1 **Does red eye fluorescence in marine fish stand out? *In situ* and *in vivo* measurements at two**  
2 **depths**

3

4 U. K. Harant <sup>1</sup> ([ulrike.harant@uni-tuebingen.de](mailto:ulrike.harant@uni-tuebingen.de))

5 F. Wehrberger ([florian.wehrberger@gmx.at](mailto:florian.wehrberger@gmx.at))

6 T. Griessler ([breschniak@gmx.net](mailto:breschniak@gmx.net))

7 M. G. Meadows <sup>2</sup> ([mmeadows@francis.edu](mailto:mmeadows@francis.edu))

8 C. M. Champ ([connor.champ@gmail.com](mailto:connor.champ@gmail.com))

9 N. K. Michiels <sup>1</sup> ([nico.michiels@uni-tuebingen.de](mailto:nico.michiels@uni-tuebingen.de))

10

11 <sup>1</sup>Department of Animal Evolutionary Ecology, Institution for Evolution and Ecology, Department of  
12 Biology, Faculty of Science, University of Tuebingen, Auf der Morgenstelle 28, 72076 Tuebingen,  
13 Germany

14

15 <sup>2</sup>Saint Francis University, Department of Biology, P.O. Box 600, Loretto, PA, 15940-0600, USA

16

17 Corresponding author: Ulrike K. Harant

18

19 Animal Evolutionary Ecology, Institution for Evolution and Ecology, Department of Biology, Faculty of  
20 Science, University of Tuebingen, Auf der Morgenstelle 28, 72076 Tuebingen, Germany

21

22 Corresponding author: Ulrike K. Harant

23

24 Keywords: *Tripterygion delaisi*, visual contrast, visual communication, coloration

25

26

27

28 **Abstract**

29 Since the discovery of red fluorescence in fish, much effort has been made to elucidate its potential  
30 contribution to vision. However, whatever that function might be, it always implies that the  
31 combination of red fluorescence and reflectance of the red iris is sufficient to generate a visual  
32 contrast. Here, we present *in vivo* iris radiance measurements of *T. delaisi* under natural light fields  
33 at 5 and 20 m depth. We also took substrate radiance measurements of shaded and exposed  
34 foraging sites at those depths. To assess the visual contrast that can be generated by the red iris, we  
35 then calculated iris brightness in the 600-650 nm “red” waveband relative to substrate radiance. At  
36 20 m depth, *T. delaisi* iris radiance substantially exceeded substrate radiance in the red waveband,  
37 regardless of exposure, and despite substrate fluorescence. Given that downwelling light in the 600-  
38 650 nm range is negligible at this depth, we can attribute this effect to iris fluorescence. As expected,  
39 contrasts were much weaker in 5 m – despite the added contribution of iris reflectance, but we  
40 identified specific substrates and conditions under which the pooled radiance caused by red  
41 reflectance and fluorescence still exceeded substrate radiance in the same waveband. Due to the  
42 negative effect of anesthesia on iris fluorescence these estimates are conservative. We conclude that  
43 the requirements to create visual brightness contrasts are fulfilled for a wide range of conditions in  
44 the natural environment of *T. delaisi*.

## 45 Introduction

46 The characteristics of downwelling light changes rapidly with depth in the water column, from  
47 directional, bright and spectrally broad near the surface to scattered, dim and spectrally narrow at  
48 depth [1-4]. The two main underlying processes are light absorption and scattering [1-4]. Light  
49 absorption is particularly strong for longer wavelengths, resulting in a skew towards intermediate,  
50 blue-green wavelengths in the visible spectrum. The remaining light is increasingly scattered as it  
51 penetrates into the water column resulting in soft, homogeneous lighting that lacks sharp  
52 illumination boundaries. These effects have profound consequences for animal coloration as well as  
53 visual perception. In shallow water, the ambient spectrum exceeds the visual perception range of  
54 fish at both ends of the spectrum. We call this zone the eurypectral zone [5]. With increasing depth,  
55 the ambient light quickly narrows down leading into the stenospectral zone, where the spectral  
56 range of visual perception can become broader than the available ambient light [5]. Most types of  
57 coloration originate from wavelength-specific absorption and reflection by pigments or structural  
58 color mechanisms. Possible hues and intensities are therefore strictly limited by their availability in  
59 the ambient spectrum. Fluorescent pigments do not have this limitation. They transform absorbed  
60 photons of a given wavelength (e.g. in the blue-green range) and re-emit light at longer wavelengths  
61 (e.g. yellow or red). Although fluorescent pigments are widespread in benthic marine organisms [6-  
62 9], their presence in fish has only recently been confirmed [6, 10-12]. The phylogenetic distribution  
63 of red fluorescence in fish correlates with camouflage and sexual signaling [12]. Anthes et al. [12]  
64 also found that the presence of conspicuously red fluorescent irides seems to be associated with a  
65 micro-predatory lifestyle [5, 13]. Moreover, a recent experimental study indicated that foraging  
66 success increases under dim, “fluorescence-friendly” cyan illumination relative to broad spectral  
67 illumination at the same brightness in the triplefin *Tripterygion delaisi* [14].

68

69 The fluorescence of *T. delaisi* is among the strongest of the fish we have measured thus far [12] and  
70 can be perceived by the human eye without the aid of an excitation source or the use of long-pass  
71 viewing filters (Figure 1). Yet, it is still weak relative to ambient light. However, visual modelling  
72 showed that it is bright enough to generate a brightness contrast between iris radiance and the  
73 background radiance that is strong enough to be perceived in conspecifics, at least for non-  
74 fluorescent backgrounds [15].

75

76 Given that natural backgrounds are very diverse, and often fluoresce in the red waveband, we  
77 scrutinize the model empirically by directly measuring whether iridal radiance in *T. delaisi* is brighter  
78 than the background radiance from the natural substrates on which it lives. To this end, we  
79 characterized the natural light environment of *T. delaisi* by measuring the down- and side-welling

80 light field as well as the radiance of typical substrates under eury spectral (5 m) and stenoscopic  
81 conditions (20 m). *T. delaisi* uses shaded as well as exposed parts of its home range for foraging,  
82 which was also considered in the choice of sites. We also measured iris radiance in anesthetized *T.*  
83 *delaisi in situ* under these conditions. Contrast estimates of substrate and iris radiance allowed us to  
84 identify combinations of substrate, depth and exposure under which iris radiance stands out against  
85 the background (Figure 1).

86

## 87 **Materials & Methods**

88 The yellow black-faced triplefin *Tripterygion delaisi* is a small, benthic fish from rocky habitats  
89 between 5 and 50 m depth along the Mediterranean and eastern Atlantic coasts [16]. It feeds mainly  
90 on small, benthic invertebrates [17, 18]. Except for the breeding season, where males develop  
91 prominent coloration, individuals are highly cryptic against their natural background, with no obvious  
92 sexual differentiation. *T. delaisi* displays highly fluorescent irides with an average peak emission ( $\lambda_{max}$ )  
93 of 609 nm with a full width at half maximum range of 572 nm to 686 nm [15]. Furthermore, it can  
94 perceive its own red fluorescence [15, 19], and regulates its fluorescence brightness actively through  
95 dispersing and aggregating melanosomes within its melanophores, so that it can switch between  
96 near-complete absence of fluorescence to maximum brightness within 10-30 sec [20].

97

### 98 *Field site*

99 Field data were collected at the Station de Recherches Sous-marines et Océanographiques (STARESO)  
100 Calvi, Corsica, France in June-July 2014 and 2015. Data were collected while scuba diving at three  
101 sites. The shallow site (1) is located just off STARESO and characterized by rocky slopes, steep walls  
102 and granite boulders down to 12 m. Exposed hard substrates are covered with a diverse community  
103 of green, red and brown algae (Appendix 1). Shaded parts are dominated by coralline red algae and  
104 sedentary animals (sponges, cnidarians, bryozoans, ascidians). Flat sandy sediments start at the  
105 bottom of the slope and are covered with seagrass (*Posidonia oceanica*), leaving only small patches  
106 of rubble and sand. The seagrass meadow slopes gently into deeper water (down to > 30 m). The  
107 deep site (2) is located 1 km East of STARESO ("La Bibliothèque"). It features large granite boulders of  
108 1-6 m across from above the surface down to 25 m. A seagrass meadow starts at the bottom of the  
109 slope. Areas between the boulders are covered with rubble and sand. The boulders are vegetated  
110 mainly by algae including calcareous algae, and some sponges and ascidians, particularly in the  
111 permanently shaded parts.

112

### 113 *General spectrometric setup*

114 Radiance measurements were taken with a calibrated PhotoResearch SpectraScan PR-740  
115 radiospectrometer in a custom-made underwater housing (BS Kinetics) with a calibrated MS-75  
116 standard lens. The PR-740 is an all-in-one aim-and-shoot spectrometer with Pritchard optics: It allows  
117 to visually focus on a target from a distance with set acceptance angles between  $0.1^\circ$  and  $1^\circ$ . It  
118 produces radiance measurements ( $\text{watts} \cdot \text{sr}^{-1} \cdot \text{m}^{-2} \cdot \text{nm}^{-1}$ ) in the 380–780 nm range with a 1 nm  
119 resolution using a bandwidth of 8 nm. Due to its cooled sensor, this spectrometer captures even very  
120 weak signals with little noise at short exposure times. A compass, a level indicator, and an electronic  
121 depth gauge were mounted on top of the housing for accurate positioning. During measurements,  
122 the dive buddy remained at a safe distance of 5 m in the front of the diver operating the device. Raw  
123 data were subsequently corrected for the transmission of the port of the underwater housing and  
124 radiance measurements were transformed into photon radiance ( $\text{photons} \cdot \text{s}^{-1} \cdot \text{m}^{-2} \cdot \text{nm}^{-1}$ ) by  
125 multiplication with  $\text{wavelength} \cdot 5.05 \cdot 10^{15}$  at each wavelength [21].  
126

#### 127 *Radiance of substrates frequented by T. delaisi*

128 We took spectral measurements throughout the day (07:30 – 18:00) from 29 typical *T. delaisi* sites  
129 that were either exposed or shaded at 5 and 20 m depth (Figure 2 A). We defined a substrate to be  
130 shaded if it was permanently shaded by e.g. overhanging rocks. Compass direction and surface slope  
131 were chosen to cover representative variation. Note that very steep, vertical or overhanging surfaces  
132 could not be measured due to handling limitations of the underwater housing, although these areas  
133 are also frequented by *T. delaisi*.

134  
135 To standardize measurements and assess small-scale variation of micro-habitat characteristics, a  
136 small transect device was created (Figure 2 B). It defined 10 arbitrary measurement points positioned  
137 around three centrally positioned standards: an exposed Polytetrafluorethylen (PTFE) diffuse white  
138 reflectance standard (Berghof Fluoroplastic Technology GmbH), (DWS) as a combined measure of  
139 downwelling and sidewelling light, a shaded DWS to assess sidewelling light only (not used for any  
140 calculations within this study), and a black standard (dark opening of a small vial covered with black  
141 cloth inside and outside) as a proxy for the amount of scattered light between spectrometer and  
142 substrate. However, the signal of the black standard was mostly too weak to be measured and was  
143 therefore not considered for any further calculations. We first measured each standard, then 10  
144 spots on the substrate, each 1 cm above each tip of the 10 measurement pointers (Figure 2 B),  
145 followed by a second measurement of each standard. In each transect, all measurements were  
146 repeated 3 times, including the standards and the 10 substrate spots. The distance between  
147 spectrometer and target was fixed at 60 cm, the minimal focal distance of the spectrometer in the  
148 submerged housing. The effect of compass direction was negligible compared to substrate exposure

149 (shaded/exposed) and time of day. We therefore omitted orientation from the results. All raw and  
150 derived substrate measurements are provided in Appendix 2 and 3.

151

152 To assess whether substrate radiance exceeds the radiance of the DWS as a proxy for the ambient  
153 light in the 600–650 nm range, we averaged measurements separately for each specific substrate  
154 type within a transect. We then calculated relative radiance as the radiance of that specific substrate  
155 type relative to the non-shaded DWS of this transect. Since the non-shaded DWS summarizes the  
156 ambient light in a more accurate way (down- plus sidewelling light) compared with the shaded DWS  
157 (sidewelling light), we only used the non-shaded DWS for all relative substrate radiance calculations.  
158 Values are expected to be smaller than 1, unless substrate fluorescence is strong relative to  
159 reflection. Note that we use the term “relative radiance” rather than the more common term  
160 “reflectance” because of the combined effects of reflection, transmission (if any) and fluorescence in  
161 our radiance measurements.

162

### 163 *Iris measurements of T. delaisi*

164 Iris radiance was measured at 5 m (site 1,  $n = 16$  individuals) and 20 m depth (site 2,  $n = 18$   
165 individuals) using the same spectrometric setup as described above but with an added SL-0.5x add on  
166 macro lens. Additionally, we used a LEE 287 Double C.T. Orange filter, which reduces the abundant  
167 blue-green range, allowing longer exposure times to capture better readings in the weak red  
168 waveband. We corrected for filter transmission when processing the data (see below).

169 A collection team first caught fish with hand nets at the target depth and brought them to the nearby  
170 measurement spot in 50 ml Falcon tubes. The measurement team then anesthetized fish with diluted  
171 clove oil and gently placed them in a transparent plastic holder fixed to a small table attached to the  
172 front of the spectrometer port (Figure 2 C). The whole head of the fish was fully exposed to the  
173 ambient light and the spectrometer. Fish were measured with the side of the eye facing South (sun  
174 exposed, more directional light) or North (shaded from direct sunlight, more scattered light).

175 Instead of the Polytetrafluorethylen (PTFE) diffuse white reflectance standard we used waterproof  
176 paper (Avery Zweckform) as a diffuse white standard (see Appendix 4 for comparative  
177 measurements). The measurement series followed a strict order: First, the white standard was  
178 measured, followed by 4 fixed positions within the fluorescent iris (top, right, bottom, left). The  
179 measurement angle (shown as a black dot in the viewfinder) was clearly smaller than the width of  
180 the iris. Each series ended with an additional measurement of the white standard. Upon completing  
181 one eye, the dive buddy turned the fish around for the other eye.

182 All data were transformed to photon radiance and corrected for reflectance (waterproof paper  
183 relative to PFTE, Appendix 2), equipment transmission and the used orange filter as explained above.

184 The measurements taken at the four positions within each eye were averaged per individual. As for  
185 the substrate measurements, we express iris radiance as relative iris radiance. All raw and relative  
186 radiance measurements are provided in Appendix 5.

187

### 188 *Data analysis*

189 To assess whether iris radiance is stronger than substrate radiance we averaged relative iris radiance  
190 as well as relative radiance per substrate type for each condition (2 depths x 2 exposures) for the 600  
191 and 650 nm waveband. We then calculated the Michelson brightness contrast as follows [22]:

192

$$193 \quad C = \frac{(\text{rel. iris rad.} - \text{rel. substrate rad.})}{(\text{rel. iris rad.} + \text{rel. substrate rad.})}$$

194

195  $C$  indicates whether iris radiance was stronger ( $0 < C \leq 1$ ) or weaker ( $-1 \leq C < 0$ ) than substrate  
196 radiance. For graphical representation, we pooled  $C$  values into 10 categories ranging from  $< 0$   
197 (substrate radiance  $>$  iris radiance) to  $> 0.8$ . The frequency of cases within each category was then  
198 compared between different substrates under the four conditions, and displayed in a mosaic plot. In  
199 these plots, each rectangular area is proportional to the abundance of substrate measurements in a  
200 particular Michelson contrast category. All Michelson contrasts are provided in Appendix 6.

201

### 202 *Contrast thresholds*

203 Whether a contrast is detectable for fish depends on several factors including the overall brightness  
204 in the environment, the size of the stimulus as well as the distance to the stimulus [23]. However, in  
205 the euphotic zone, fish with relatively well developed eyes looking at a stimulus roughly matching  
206 their size within an ecologically relevant distance have a contrast threshold of 1-2% under bright light  
207 conditions [23]. Hence, under optimal daylight conditions, it is assumed that a Michelson contrast  
208 between  $C = 0.007$ – $0.05$  should be detectable by most fish [24-27].

209

## 210 **Results**

211

### 212 *Relative radiance of substrates*

213 At 5 m, relative substrate radiance was largely below one, indicating that fluorescent components in  
214 the substrate were too weak to compete with the ambient light (Figure 3). At 20 m, however, relative  
215 substrate radiance substantially increased at longer wavelengths, starting at 600 nm and going up to  
216 700 nm (at the borderline of human color vision). At least to some extent, this effect can be  
217 attributed to fluorescence from photosynthetic active organisms. Depending on type and exposure,

218 substrate radiation exceeded that of ambient light (indicated by the line at  $y = 1$  in Figure 3) by a  
219 factor of up to four in the 600–700 nm range.

220

#### 221 *Relative radiance of T. delaisi irides*

222 At 5 m, relative radiance of fish irides exceeded 1 in the deep red range (> 680 nm) under shaded  
223 conditions (eye facing north) only (Figure 4). This can be explained by the strong red component in  
224 the down- and sidewelling light that overrides the fluorescence signal in exposed fish. At 20 m,  
225 however, iris radiance exceeded diffuse white standard radiance by up to 9 times (one single  
226 measurement), irrespective of exposure – an effect that can only be attributed to iris fluorescence.

227

#### 228 *Comparison between iris and substrate relative radiance*

229 At 5 m, substrate type and exposure determined whether iris radiance exceeded substrate radiance  
230 (Figure 5): More contrast prevailed under shaded conditions. Under exposed conditions, iris  
231 radiances exceeding substrate radiance were limited to bare rock and sponge substrates, as these  
232 two exhibit distinct fluorescence compared to others. At 20 m, however, iris radiance was always  
233 stronger in the target wavelength range regardless of substrate type and exposure (Figure 5). The  
234 time of the day affected iris contrast only at 5 m depth. Under exposed conditions, iris radiance is  
235 more likely to exceed substrate radiance in the morning than in the afternoon (Figure 6). Conversely,  
236 under shaded conditions, iris radiance always exceeded substrate radiance in the afternoon, but less  
237 so in the morning. An effect of the time of the day was absent at 20 m (data not shown).

238

#### 239 *Anesthesia effect*

240 Using clove oil for anesthesia leads to a noticeable reduction in iris radiance due to expanding iridal  
241 melanophores [20]. This is especially true for fish from 20 m depth, where anesthesia decreases iris  
242 radiance by 46 % on average compared with non-anesthetized fish. Fish caught at 5 m depth reduced  
243 their iris radiance by only 14 % on average after being anesthetized. The depth-dependency can be  
244 explained by reduced iridal melanophore densities in individuals at depth [20, 24]. Therefore, and  
245 conservative regarding our research hypothesis, all measurements presented here underestimate  
246 natural iris radiance, particularly in individuals from deeper water (see estimated mean relative iris  
247 radiance in Figure 4).

248

#### 249 **Discussion**

250

251 Iris radiance of *Tripterygion delaisi* in the 600–650 nm wavelength range exceeded that of the  
252 available substrates under stenopspectral conditions at 20 m, irrespective of substrate type, exposure



253 and time of day. Under eurypectral conditions at 5 m, however, iris radiance was often less bright  
254 compared with the reflection of the stronger red component in the ambient light. Yet, even at this  
255 depth, iris radiance exceeded substrate radiance in shaded sites dominated by side-welling blue-  
256 green scatter. Due to the effect of anesthesia on iris fluorescence, these estimates are conservative.  
257 Consequently, our work confirms empirically that iris radiance (reflectance + fluorescence) in *T.*  
258 *delaisi* is strong enough to generate visual brightness contrasts in a large part of its natural  
259 environment, particularly at deeper sites [5, 24]. Bitton et al. [15] produced similar results through  
260 modelling, but assuming an achromatic, non-fluorescent background. Our results now confirm that  
261 those results may hold against complex, partly fluorescent backgrounds as well.  
262 The lack of longer wavelengths along with the reduced overall brightness make stenoscopic  
263 habitats particularly suitable for the use of fluorescence to generate contrast [5, 24]. This might  
264 explain why some particularly strongly fluorescing species are restricted to deeper water such as  
265 several species of *Bryaninops*, *Ctenogobiops*, or *Crenilabrus* [12]. Although Anthes et al [12] did not  
266 find a correlation between increasing depth and red fluorescence across species, it is safe to assume  
267 that red fluorescence is more likely to contribute to vision in deeper water rather than in shallow  
268 water. In fact, when analyzing individuals collected at 5 and 20 m within single species (including *T.*  
269 *delaisi*.), Meadows et al [5] found that fluorescence brightness increased with depth when measured  
270 under identical laboratory conditions. Although we did not investigate the functionality of red  
271 fluorescence, our results are nevertheless in line with previous suggestions that intraspecific  
272 communication [15] or even prey detection using active photolocation might be facilitated through  
273 red fluorescence [12, 14].

274

#### 275 *Limitations of measuring different T. delaisi habitat types*

276 Although we identified several substrate types on which red fluorescence is particularly likely to  
277 generate perceptible brightness contrasts, we need to emphasize that certain typical microhabitats  
278 could not be measured. Due to handling limitations of the underwater housing, and the need for  
279 upward facing substrates to place the transect device (Figure 2 B), we could not take measurements  
280 from underneath overhangs or in crevices, which are also important for triplefins. However, given  
281 that these shaded sites are exclusively illuminated by blue-green, side-welling light, relative iris  
282 radiance in the long-wavelength range should be high, except where encrusting red calcareous algae  
283 are common. The latter often cover large areas inside crevices and exhibit very strong red  
284 fluorescence.

285

#### 286 *Conclusions*

287 We found that in *T. delaisi*, iris radiance in the 600-650 nm bandwidth exceeds the radiance of all  
288 measured natural backgrounds in deeper water. This effect can largely be attributed to red  
289 fluorescence, which strongly exceeds reflection at depth. But even in shallow water, where red  
290 reflectance is considerable [15], iris radiance exceeded that of the background for several substrate  
291 types, particularly when shaded. Our findings show that iris radiance can generate relevant visual  
292 brightness contrasts against its natural background and might therefore also be relevant in terms of  
293 prey detection or intra-specific communication.

294

#### 295 **Acknowledgement**

296 We would like to thank Andreas 'Oeli' Oelkrug, Christopher Rader, and Gregor Schulte for technical  
297 assistance. Additionally, we want to thank our hosts in STARESO, Corsica, for providing excellent  
298 working conditions both below and above the surface.

299

#### 300 **Authors' contributions**

301 UKH and NKM designed the experiments and optimized the methodology. Data collection: UKH,  
302 NKM, MGM, CMC, FW, TG. Data analyses and drafting of the manuscript: UKH. Editing of the  
303 manuscript: UKH, NKM, MGM, FW, TG, CMC. All authors read and approved the final manuscript.

304

#### 305 **Author details**

306 Animal Evolutionary Ecology, Institution for Evolution and Ecology, Department  
307 of Biology, Faculty of Science, University of Tuebingen, Auf der Morgenstelle  
308 28, 72076 Tuebingen, Germany. This work was funded by a Reinhart Koselleck Project Grant  
309 Mi482/13-1 from the Deutsche Forschungsgemeinschaft to N.K.M.

310

#### 311 **Competing interests**

312 The authors declare that they have no competing interests.

313

314

315 **Literature**

316

- 317 1. Jerlov NG: **Optical oceanography**, vol. 5. Amsterdam: Elsevier Publishing Company;  
318 1968.
- 319 2. Loew ER, Zhang H: **Propagation of visual signals in the aquatic environment: An**  
320 **interactive windows-based model**. *Communication in Fishes Volume 2006*, **2**.
- 321 3. Marshall NJ, Jennings K, McFarland WN, Loew ER, Losey GS: **Visual biology of**  
322 **Hawaiian coral reef fishes. III. Environmental light and an integrated approach to**  
323 **the ecology of reef fish vision**. *Copeia* 2003, **2003**(3):467-480.
- 324 4. Lythgoe JN: **Ecology of vision**. Oxford: Clarendon Press; 1979.
- 325 5. Meadows MG, Anthes N, Dangelmayer S, Alwany MA, Gerlach T, Schulte G, Sprenger  
326 D, Theobald J, Michiels NK: **Red fluorescence increases with depth in reef fishes,**  
327 **supporting a visual function, not UV protection**. *Proceedings Biological sciences*  
328 2014, **281**(1790).
- 329 6. Sparks JS, Schelly RC, Smith WL, Davis MP, Tchernov D, Pieribone VA, Gruber DF: **The**  
330 **covert world of fish biofluorescence: a phylogenetically widespread and**  
331 **phenotypically variable phenomenon**. *PLoS One* 2014, **9**(1):e83259.
- 332 7. Eyal G, Wiedenmann J, Grinblat M, D'Angelo C, Kramarsky-Winter E, Treibitz T, Ben-  
333 Zvi O, Shaked Y, Smith TB, Harii S: **Spectral diversity and regulation of coral**  
334 **fluorescence in a mesophotic reef habitat in the red sea**. *PloS one* 2015,  
335 **10**(6):e0128697.
- 336 8. Alieva NO, Konzen KA, Field SF, Meleshkevitch EA, Hunt ME, Beltran-Ramirez V,  
337 Miller DJ, Wiedenmann J, Salih A, Matz MV: **Diversity and evolution of coral**  
338 **fluorescent proteins**. *PLoS One* 2008, **3**(7):e2680.
- 339 9. Marshall NJ, Johnsen S: **Fluorescence as a means of colour signal enhancement**.  
340 *Philosophical Transactions of the Royal Society B* 2017, **372**:20160335.
- 341 10. Michiels NK, Anthes N, Hart NS, Herler J, Meixner AJ, Schleifenbaum F, Schulte G,  
342 Siebeck UE, Sprenger D, Wucherer MF: **Red fluorescence in reef fish: a novel**  
343 **signalling mechanism?** *BMC Ecology* 2008, **8**(1):16.
- 344 11. Gerlach T, Theobald J, Hart NS, Collin SP, Michiels NK. **Fluorescence characterisation**  
345 **and visual ecology of pseudocheilnid wrasses**. *Frontiers in Zoology*. 2016, **13**(1):13.

- 346 12. Anthes N, Theobald J, Gerlach T, Meadows MG, Michiels NK: **Diversity and Ecological**  
347 **Correlates of Red Fluorescence in Marine Fishes.** *Frontiers in Ecology and Evolution*  
348 2016, **4**(126).
- 349 13. **Detecting the Detector: A Widespread Animal Sense?**  
350 [<http://vixra.org/abs/1411.0226>] Accessed: 25.01.2017.
- 351 14. Harant UK, Michiels NK: **Fish with red fluorescent eyes forage more efficiently under**  
352 **dim, blue-green light conditions.** *BMC Ecology* 2017, **17**(1):18.
- 353 15. Bitton P-P, Harant UK, Fritsch R, Champ CM, Temple SE, Michiels NK: **Red**  
354 **fluorescence of the triplefin *Tripterygion delaisi* is increasingly visible against**  
355 **background light with increasing depth.** *Royal Society Open Science* 2017,  
356 **4**(3):161009.
- 357 16. Louisy P: **Meeresfische: Westeuropa und Mittelmeer.** Ulmer; 2002.
- 358 17. Zander C, Heymer A: ***Tripterygion tripteronotus* Risso 1810 und *Tripterygion***  
359 ***xanthosoma n. sp.* Eine ökologische Speziation.** *Vie et Milieu Serie A-Biologie Marine*  
360 1970, **21**:363-394.
- 361 18. Zander CD, Hagemann T: **Feeding ecology of littoral gobiid and blennioid fishes of**  
362 **the Banyuls area (Mediterranean Sea). III. Seasonal variations.** *Scientia Marina*  
363 1989, **53**(2):441-449.
- 364 19. Kalb N, Schneider RF, Sprenger D, Michiels NK: **The red-fluorescing marine fish**  
365 ***Tripterygion delaisi* can perceive its own red fluorescent colour.** *Ethology* 2015,  
366 **121**(6):566-576.
- 367 20. Wucherer MF, Michiels NK: **Regulation of red fluorescent light emission in a cryptic**  
368 **marine fish.** *Frontiers in Zoology* 2014, **11**(1):1.
- 369 21. Johnsen S: **The Optics of Life: A Biologist's Guide to Light in Nature.** New Jersey:  
370 Princeton University Press; 2011.
- 371 22. Michelson A: **Studies in optics.** New York: Courier Corporation; 1995.
- 372 23. Cronin TW, Johnsen S, Marshall NJ, Warrant EJ: **Visual ecology.** New Jersey:  
373 Princeton University Press; 2014.
- 374 24. Harant UK, Michiels NK, Anthes N, Meadows MG: **The consistent difference in red**  
375 **fluorescence in fishes across a 15 m depth gradient is triggered by ambient**  
376 **brightness, not by ambient spectrum.** *BMC Research Notes* 2016, **9**(1):1.

- 377 25. Hester FJ: **Visual contrast thresholds of the goldfish (*Carassius auratus*)**. *Vision*  
378 *Research* 1968, **8**(10):1315-1335.
- 379 26. Anthony PD: **Visual Contrast Thresholds in the Cod *Gadus Morhua* L.** *Journal of Fish*  
380 *Biology* 1981, **19**(1):87-103.
- 381 27. Hawryshyn CW, Arnold MG, Chaisson DJ, Martin PC: **The ontogeny of ultraviolet**  
382 **photosensitivity in rainbow trout (*Salmo gairdneri*)**. *Visual Neuroscience* 1989,  
383 **2**(3):247-254.
- 384 28. Douglas R, Djamgoz M: **The visual system of fish**. Springer Science & Business Media;  
385 2012.

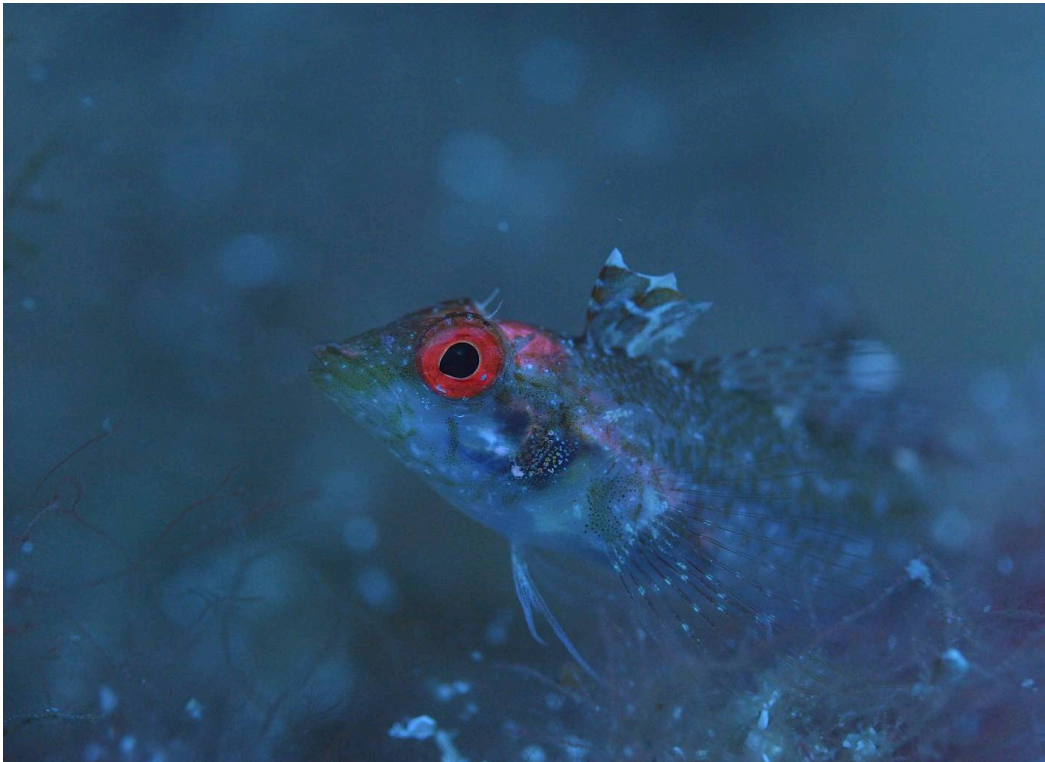

**Figure 1:** *Tripterygion delaisi* showing conspicuous red iris fluorescence 30 m depth. Picture taken with Nikon D4 + LEE 287 Double C. T. Orange filter and manual white balance, without post-processing (Nico K. Michiels). Note that the LEE filter 287 is not a long pass filter (as is e.g. LEE 105 Orange or LEE 106 Primary Red). It is designed to correct a natural sun lit scene to a warmer spectrum in photography (C. T. = “Correct to Tungsten”). Combined with Manual White Balance, this results in pictures that show colors at depth, including fluorescence, to how they are perceived by a human diver.

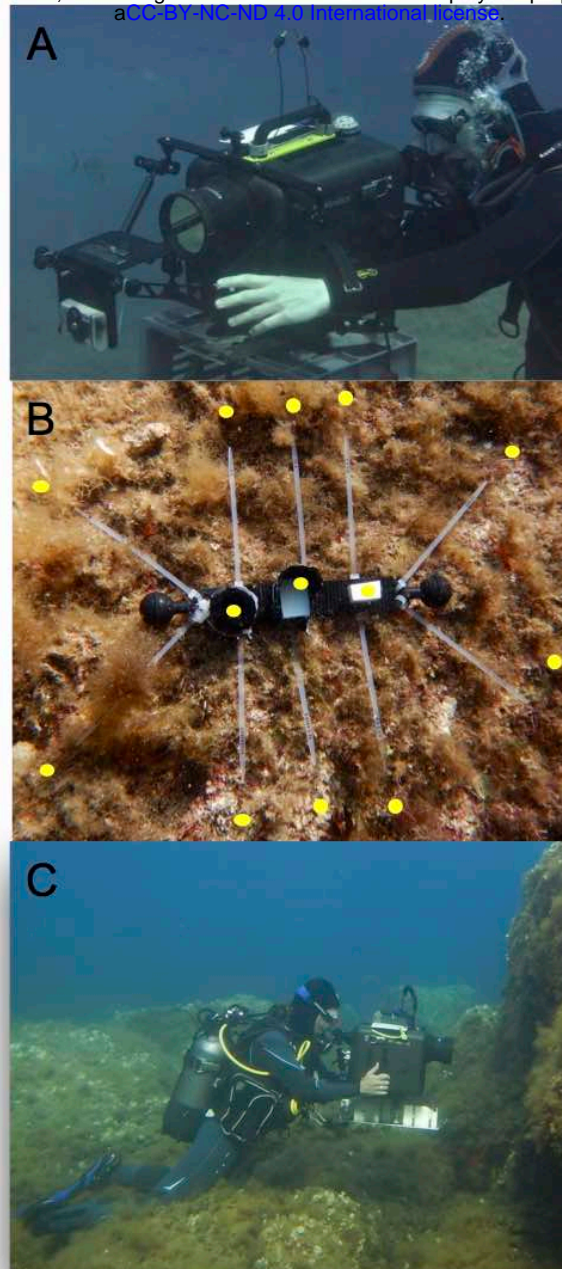

**Figure 2 A:** Substrate radiance measurements were taken at 5 and 20 m depth using a calibrated radiospectrometer (PR740) in a custom made underwater housing (BS Kinetics).

**B:** Substrate transect device with reflectance standards in the centre (left to right): black standard, shaded diffuse white standard (PTFE) and non-shaded diffuse white standard (PTFE) (only the last one was used for the calculations presented here). Spectral measurements pointing horizontally onto the substrate were taken approx. 1 cm beyond each of 10 cable binder tips (yellow spot). The length of the central black carrier is 22.5 cm.

**C:** Iris radiance measurements taken with a radiospectrometer aiming at a laterally oriented and secured fish at 20 m depth.

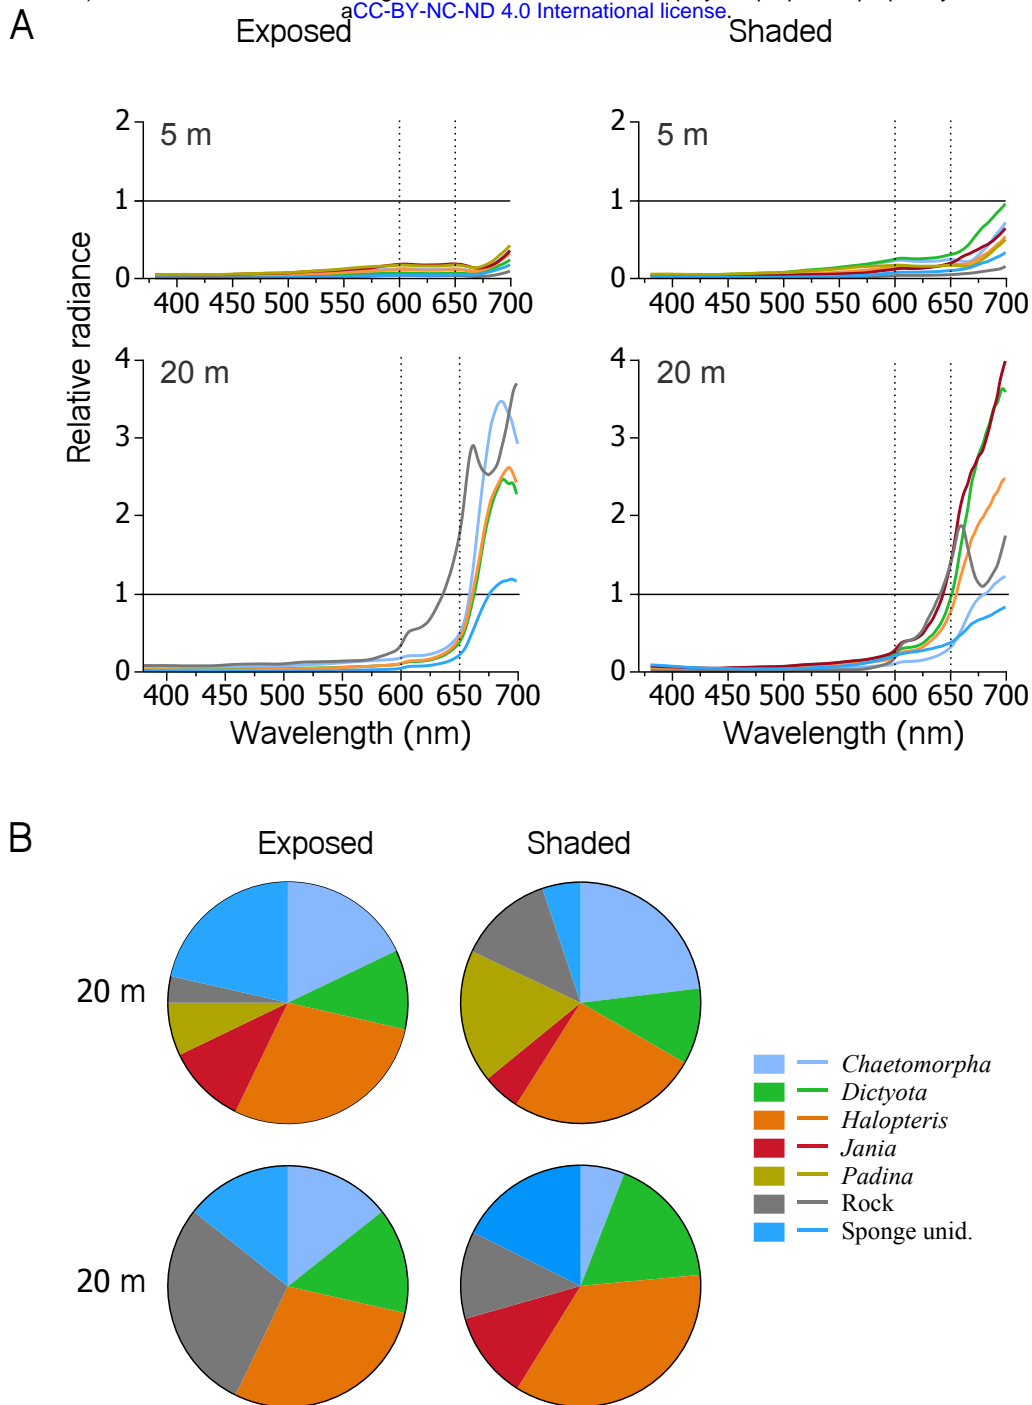

**Figure 3: A.** Line plots showing mean relative radiance of typical *T. delaisi* substrate types as a function of wavelength at 5 and 20 m depth (rows) under sun-exposed and shaded conditions (columns). Values exceeding 1 (black line, referring to diffuse white standard) indicate substrates that emitted more light in that spectral range than was available in the side/downwelling spectrum, a typical signature of strong fluorescence. Dashed lines indicate the waveband of interest (600–650 nm). **B.** Pie charts showing Relative abundance of substrates measured at each combination of depth and exposure. For a detailed species list see Appendix 1.



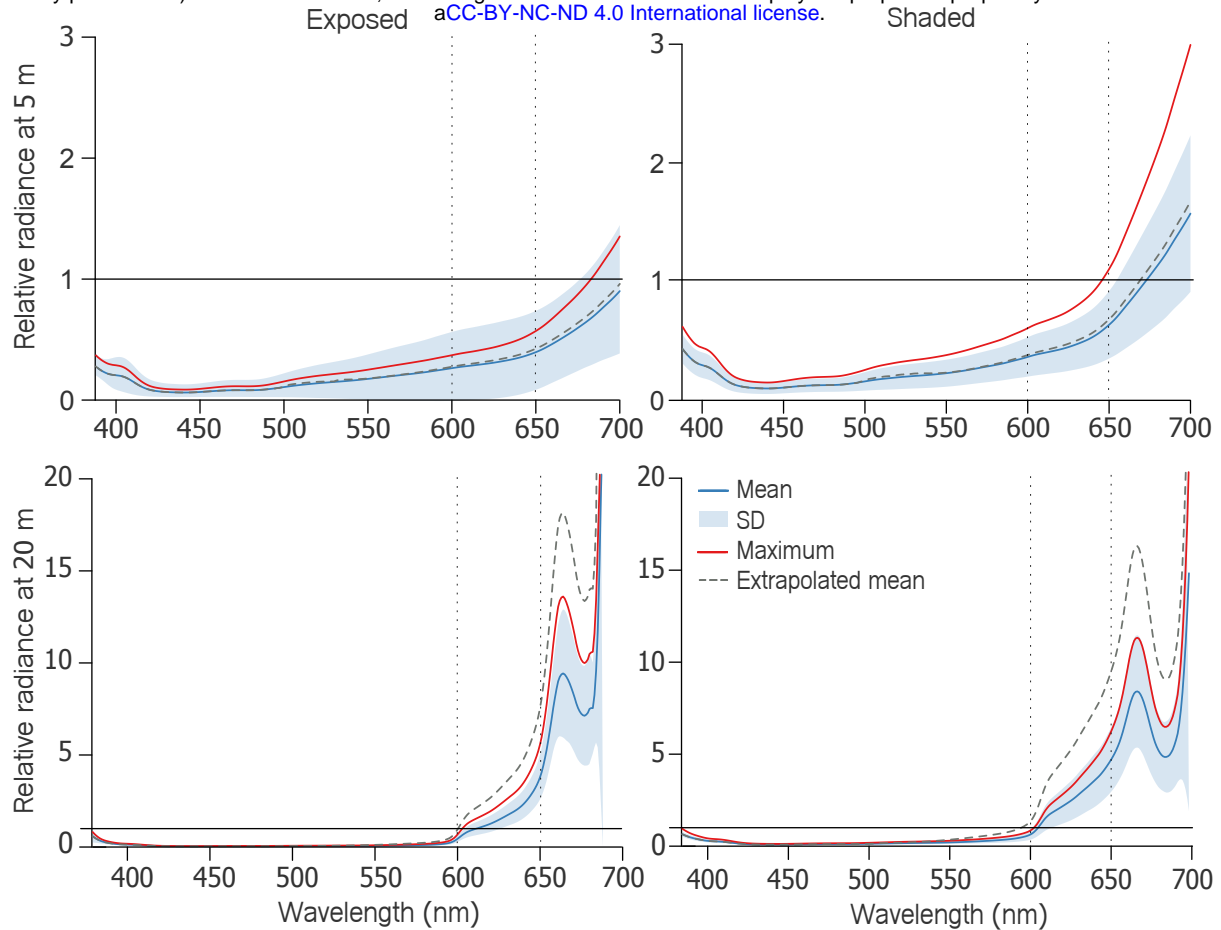

**Figure 4:** Line plot showing relative iris radiance of *Tripterygion delaisi* as a function of wavelength under exposed (left column) and shaded (right column) conditions at either 5 m (upper row) or 20 m depth (lower row). Blue lines represent means  $\pm$  SD (shading) of all fish. Red lines indicate the maximum relative radiance averaged across individuals ( $n = 34$ ). Dashed vertical lines indicate the wavelength range of interest (600–650 nm). Values exceeding 1 (horizontal black line) indicate that more photons were emitted by the fish iris at that wavelength than were available in the ambient spectrum, indicative of red fluorescence (assuming absence of specular reflection).

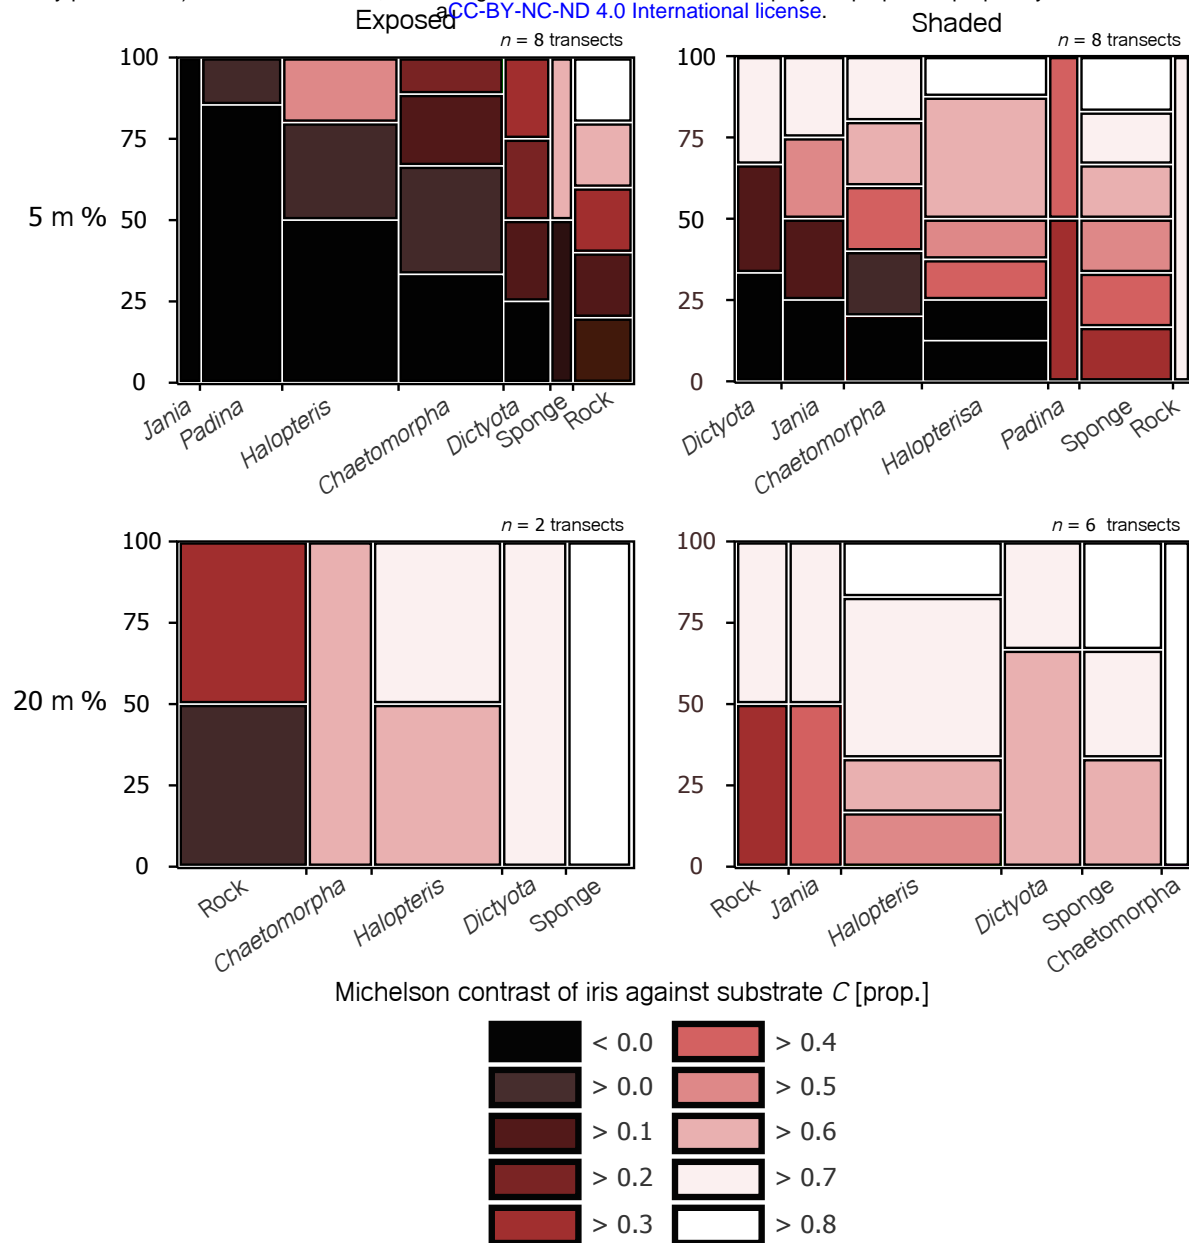

**Figure 5:** Mosaic plot showing the relative distribution of Michelson contrasts in the target waveband (600–650 nm) (Y-axis) within the 8 commonest substrates (X-axis) at 5 and 20 m depth under exposed or shaded conditions. We defined 10 Michelson contrast categories, where all except the darkest (black) shading indicate iris radiances exceeding substrate radiance. Substrates were ranked from the lowest to the highest brightness contrast.

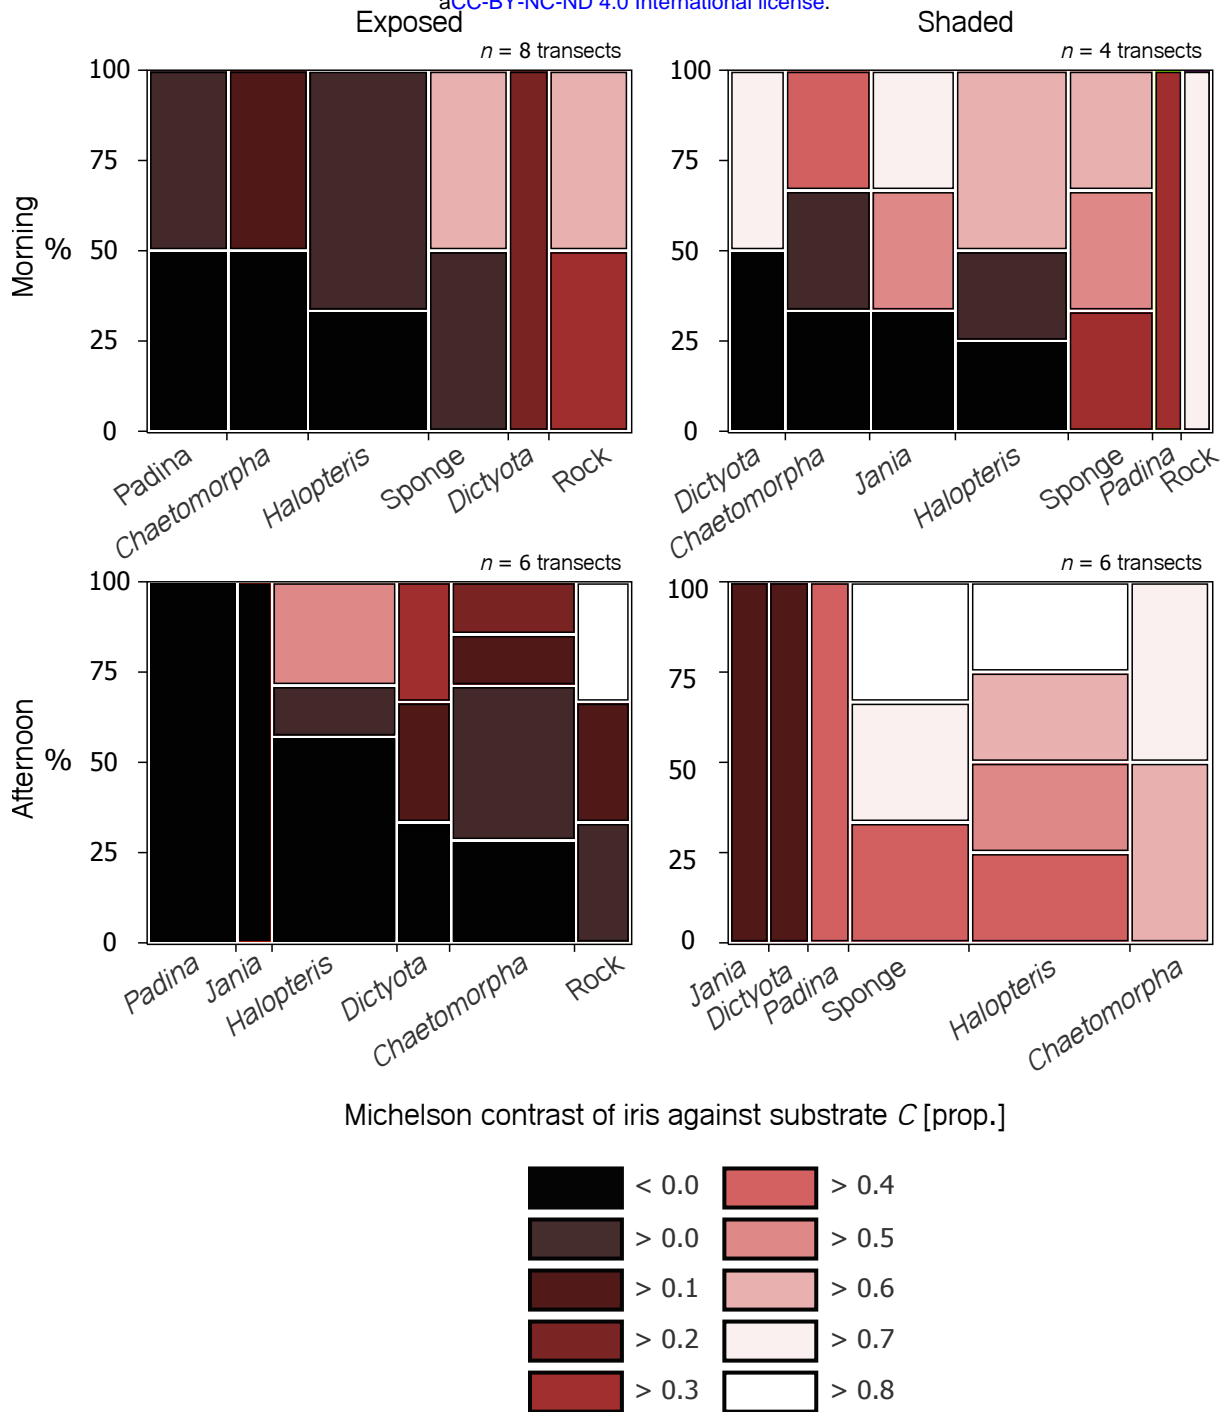

**Figure 6:** Mosaic plot showing the relative distribution of Michelson contrasts in the target waveband (600–650 nm) (Y-axis) within the 8 commonest substrates (X-axis) at 5 and 20 m depth in the morning (06:00 – 11:30, top) or afternoon (12:00 – 18:00, bottom) under exposed (left) and shaded (right) conditions. Values > 0 (dark red to white) are cases where iris radiance exceeds substrate radiance in the relevant wavelength range. Substrates were ranked from the lowest to the highest brightness contrast.

**Appendix 1:** Species list and photographic documentation of measured substrates.

**Appendix 2:** Raw data of all substrate measurements taken.

**Appendix 3:** Relative radiance data of substrate measurements.

**Appendix 4:** Comparison between diffuse white standards (PTFE vs. underwater proof paper)

**Appendix 5:** Raw and relative radiance data of *in situ* iris measurements taken in *T. delaisi*.

**Appendix 6:** Michelson contrast calculations of iris against substrate.
